# Supplementary material for: REST Controls Self-Renewal and Tumorigenic Competence of Human Glioblastoma Cells
Source: PubMed Central journal article supplement (PMC3372516; doi:10.1371/journal.pone.0038486), 2012-06-11

**A** Gene Expression Plot (REST)

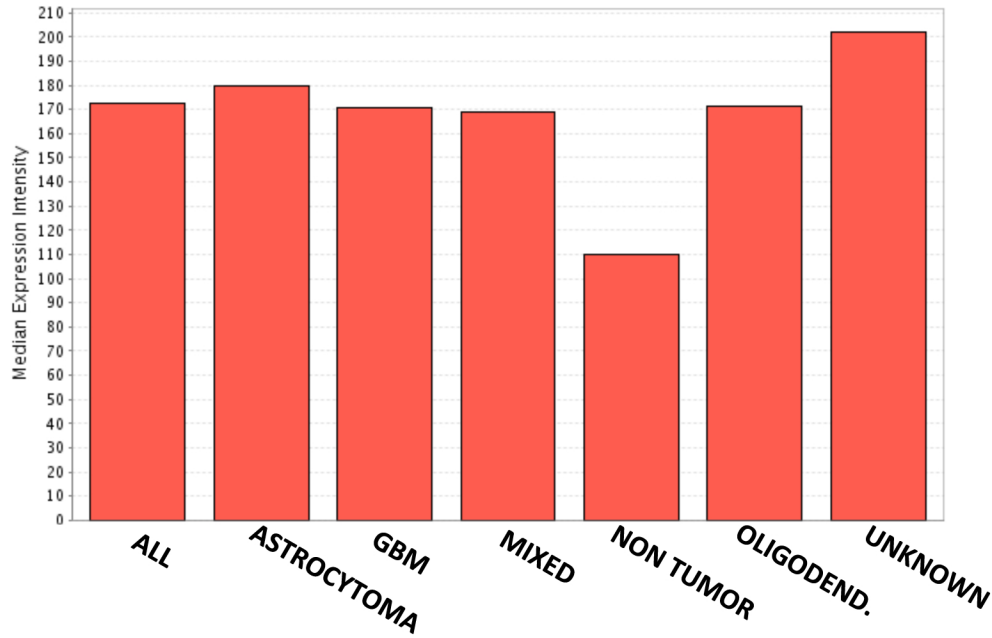

**B** Kaplan-Meier Survival Plot for Samples with Copy Number Analysis for REST(4q12)

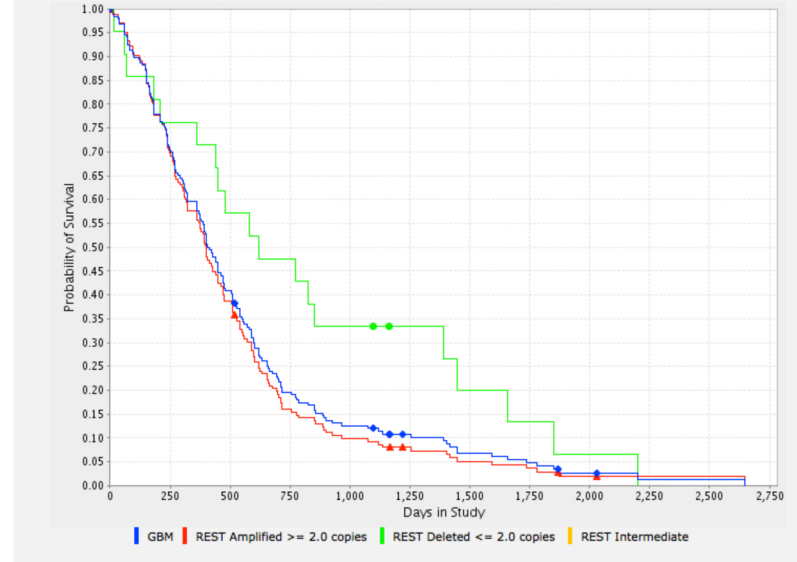

Supplement: pone.0038486.s001.pdf [file pone.0038486.s001.pdf]
