# Supplementary material for: REST Controls Self-Renewal and Tumorigenic Competence of Human Glioblastoma Cells
Source: PubMed Central journal article supplement (PMC3372516; doi:10.1371/journal.pone.0038486), 2012-06-11

**A**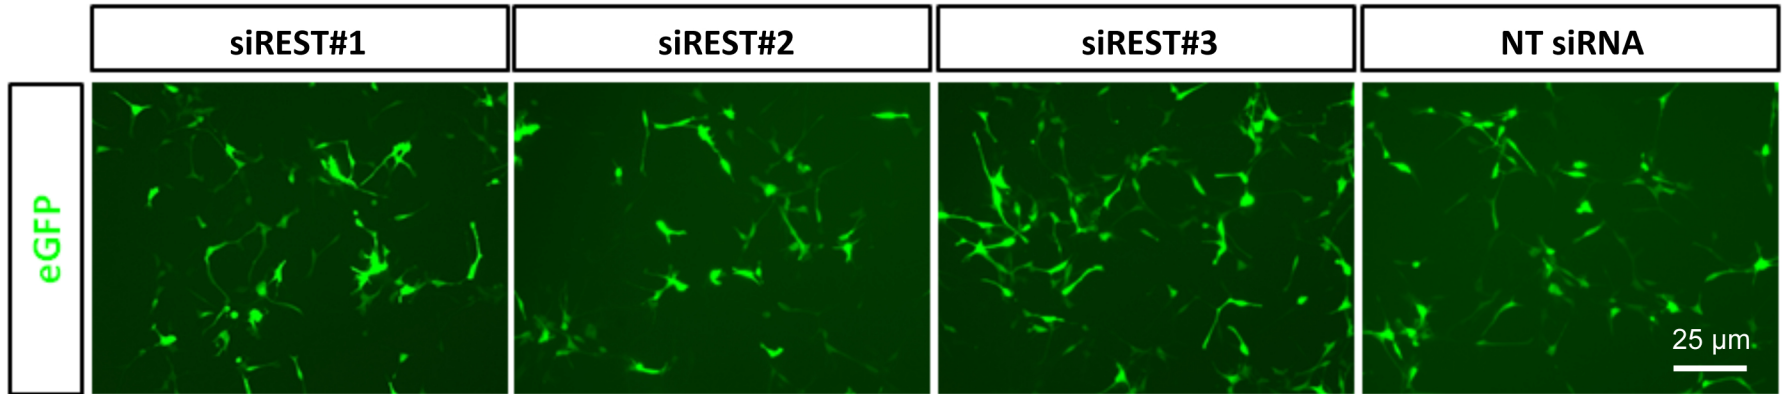**B**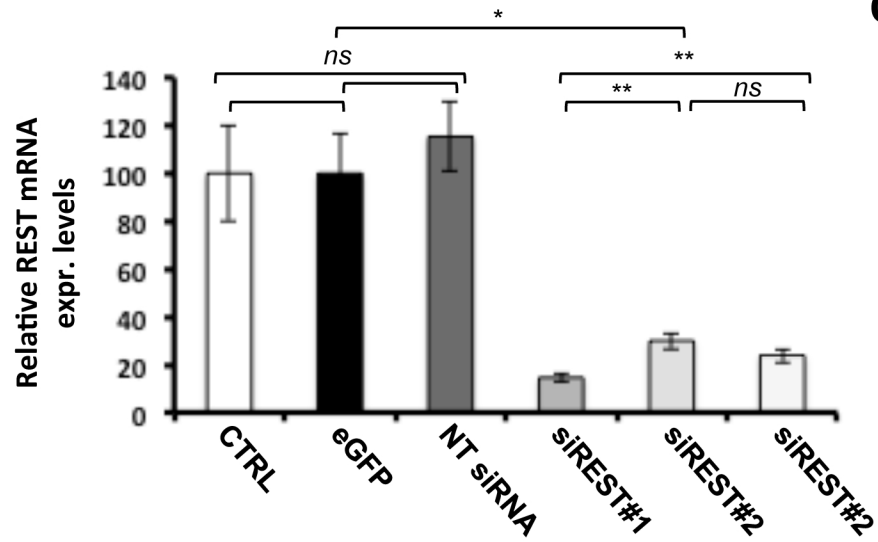**C**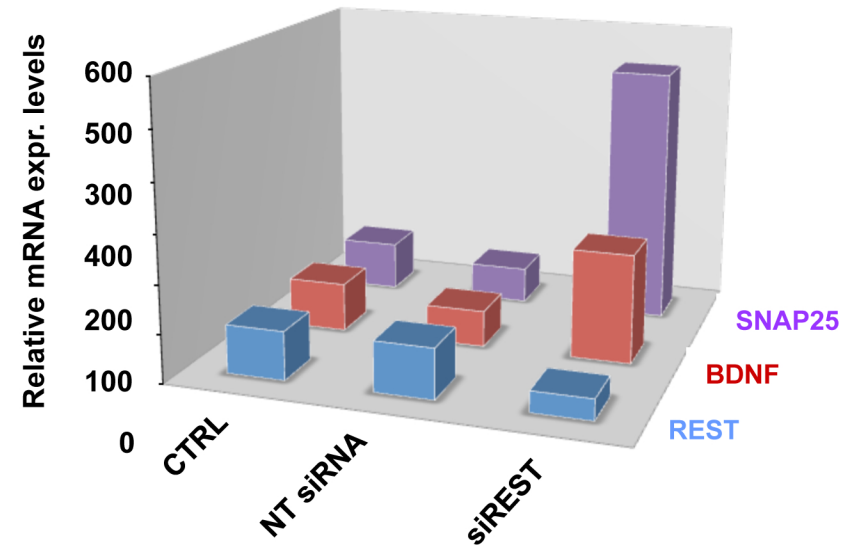

Supplement: pone.0038486.s009.pdf [file pone.0038486.s009.pdf]
